# Supplementary material for: A sole multi-analyte receptor responds with three distinct fluorescence signals: traffic signal like sensing of Al3+, Zn2+and F−
Source: Royal Society of Chemistry journal article supplement (doi:10.1039/c5dt01468a), 2015-01-01
Supplement: c5dt01468a1.pdf [file c5dt01468a1.pdf]

**Supporting Information**

**A Sole Multi-Analyte receptor responds with three distinct  
fluorescence signals: Traffic signal like sensing of Al<sup>3+</sup>, Zn<sup>2+</sup>  
and F<sup>-</sup>**

*Barun Kumar Datta,<sup>a</sup> Durairaj Thiyagarajan,<sup>b</sup> Aiyagari Ramesh\*,<sup>b</sup> and Gopal Das\*,<sup>a</sup>*

<sup>a</sup> Department of Chemistry  
Indian Institute of Technology Guwahati, Guwahati 781039, Assam, India  
E-mail: gdas@iitg.ernet.in (Gopal Das)

<sup>b</sup> Department of Biosciences and Bioengineering  
Indian Institute of Technology Guwahati, Guwahati 781039, Assam, India  
E-mail: aramesh@iitg.ernet.in (Aiyagari Ramesh)

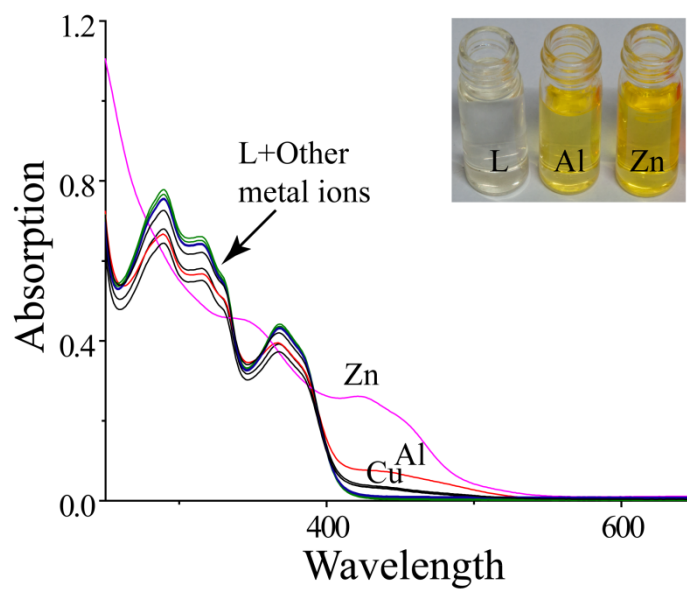

**Fig. S1:** Changes in the absorption spectra of L upon the addition of different metal ions. INSET: Visual colour change upon the addition of  $\text{Al}^{3+}$  and  $\text{Zn}^{2+}$  to L.

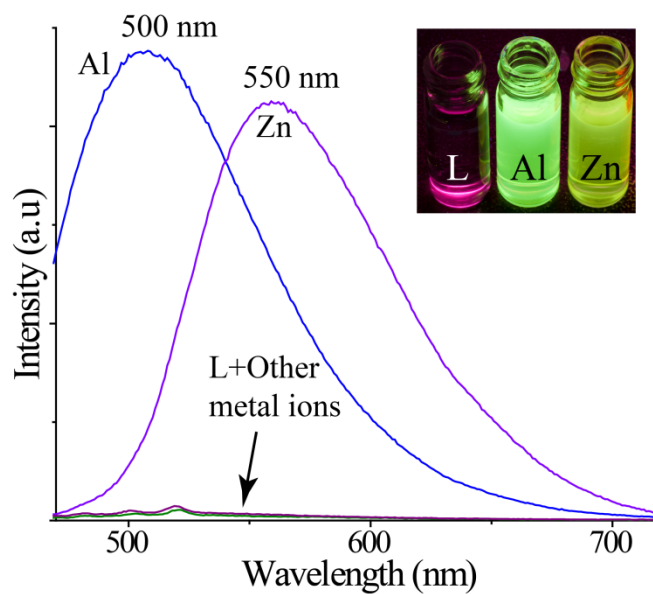

**Fig. S2:** Changes in the emission spectra of **L** upon the addition of different metal ions. INSET: Visual colour change upon the addition of Al<sup>3+</sup> and Zn<sup>2+</sup> to **L** under UV lamp ( $\lambda_{\text{ex}} = 365 \text{ nm}$ ).

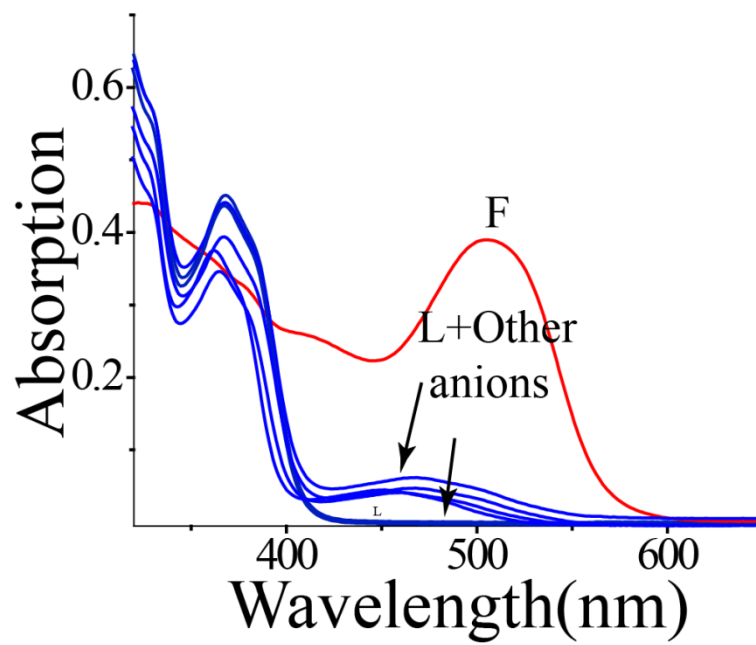

**Fig. S3:** Changes in the absorption spectra of L upon the addition of different anions.

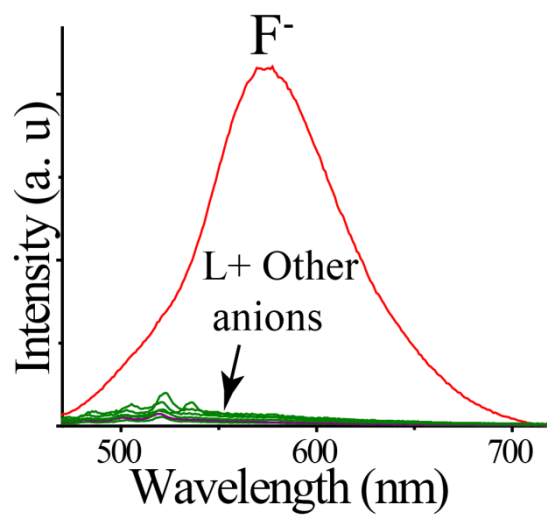

**Fig. S4:** Changes in the emission spectra of **L** upon the addition of different anions.

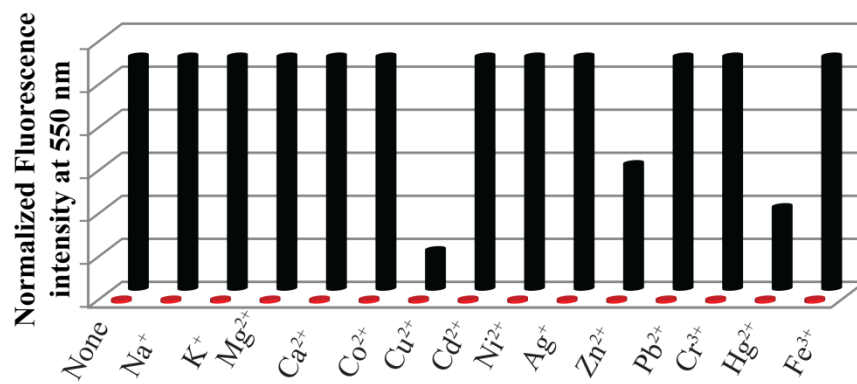

**Fig S5:** Normalized fluorescence responses of **L** (10  $\mu$ M) to various cations in mixed solvent. The red bars represent the emission intensities of **L** in the presence of cations of interest (5 eqv.). The black bars represent the change of the emission that occurs upon the subsequent addition of  $\text{Al}^{3+}$  to the above solution.

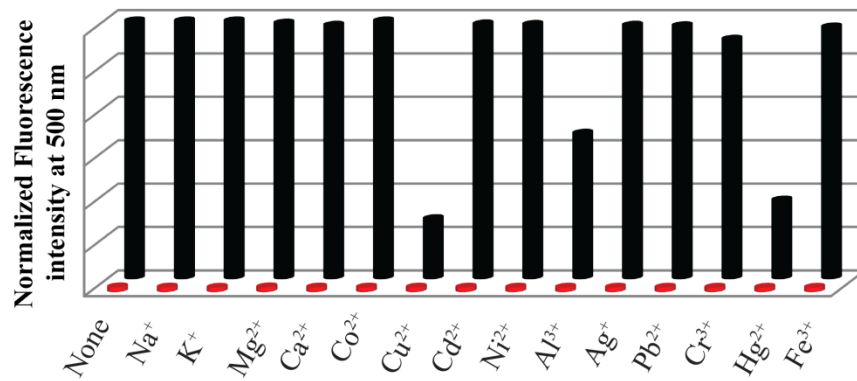

**Fig S6:** Normalized fluorescence responses of **L** (10  $\mu$ M) to various cations in mixed solvent. The red bars represent the emission intensities of **L** in the presence of cations of interest (5 eqv.). The black bars represent the change of the emission that occurs upon the subsequent addition of Zn<sup>2+</sup> to the above solution.

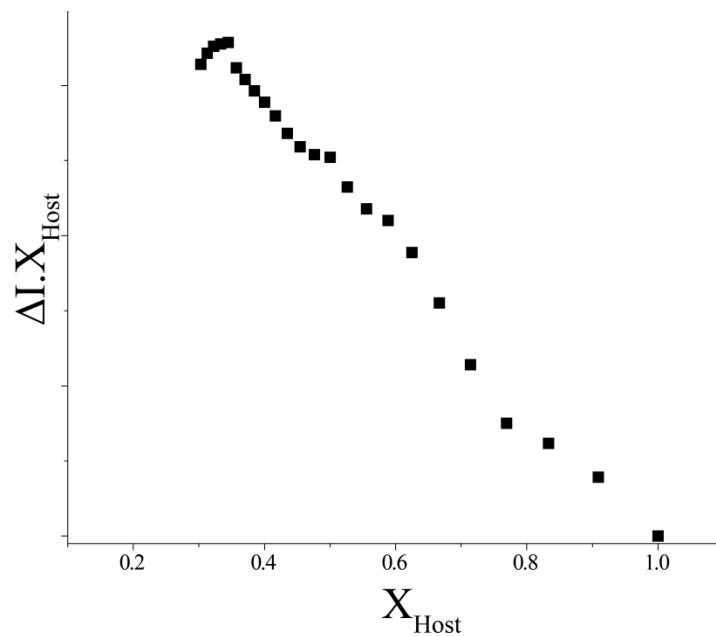

**Fig S7:** Job's plot between **L** and  $\text{Al}^{3+}$  ions.  $X_{\text{Host}}$  is the mole fraction of **L** and  $\Delta I$  is the change ( $I-I_0$ ) in the intensity of the emission spectra in presence of guest i.e;  $\text{Al}^{3+}$ .



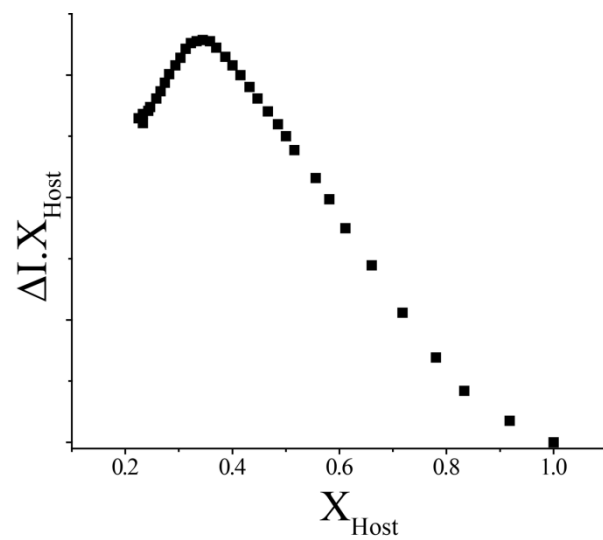

**Fig S8:** Job's plot between **L** and  $\text{Zn}^{2+}$  ions.  $X_{\text{Host}}$  is the mole fraction of **L** and  $\Delta I$  is the change ( $I-I_0$ ) in the intensity of the emission spectra in presence of guest i.e;  $\text{Zn}^{2+}$ .

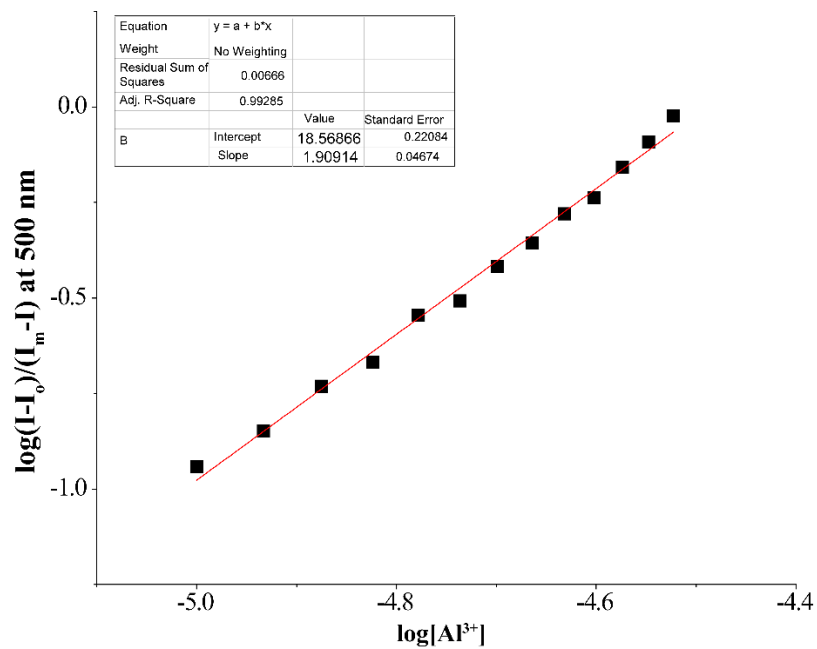

**Fig S9:** Bensei-Hildebrand plot obtained for  $Al^{3+}$  from the emission experiment (emission intensity calculated from 500 nm) studies.

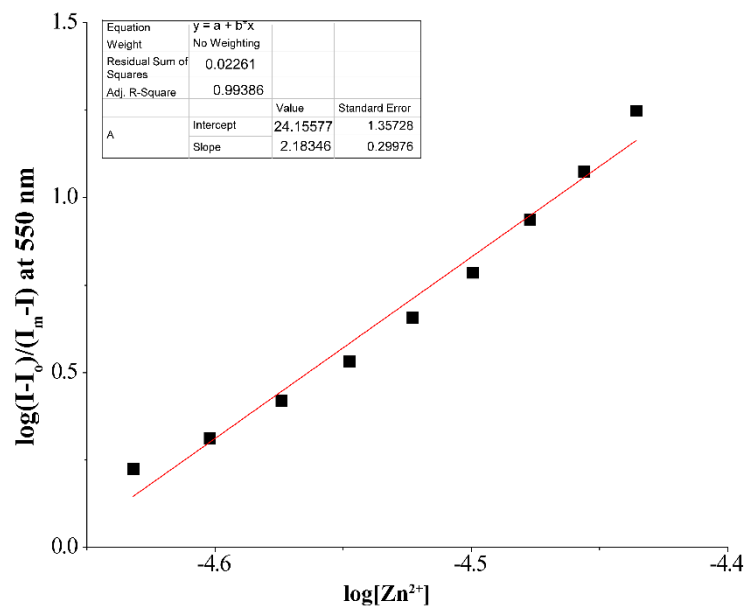

**Fig S10:** Bensei-Hildebrand plot obtained for  $Zn^{2+}$  from the emission experiment (emission intensity calculated from 550 nm) studies.

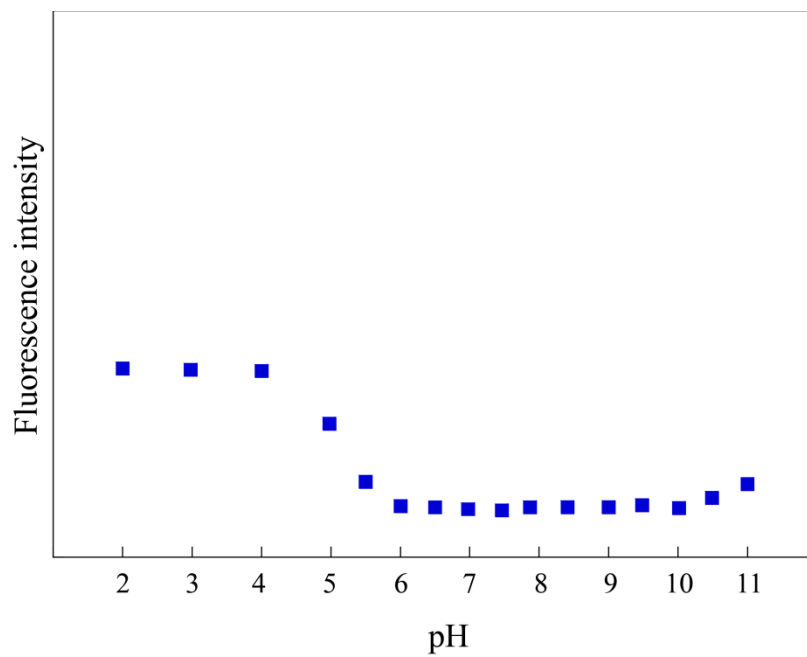

**Fig S11:** Effect of pH on the fluorescence intensity of **L**.

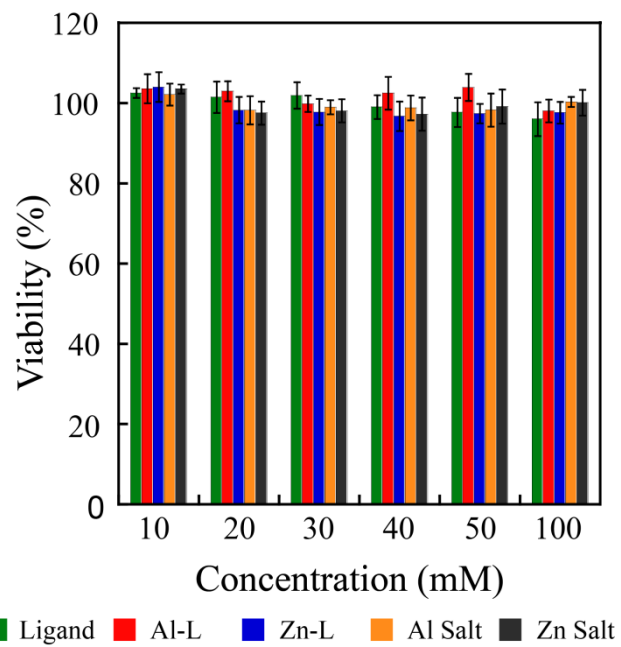

**Fig S12:** MTT assay to determine the cytotoxic effects of compounds **L**, **L-Al** and **L-Zn** complex on HeLa cells.

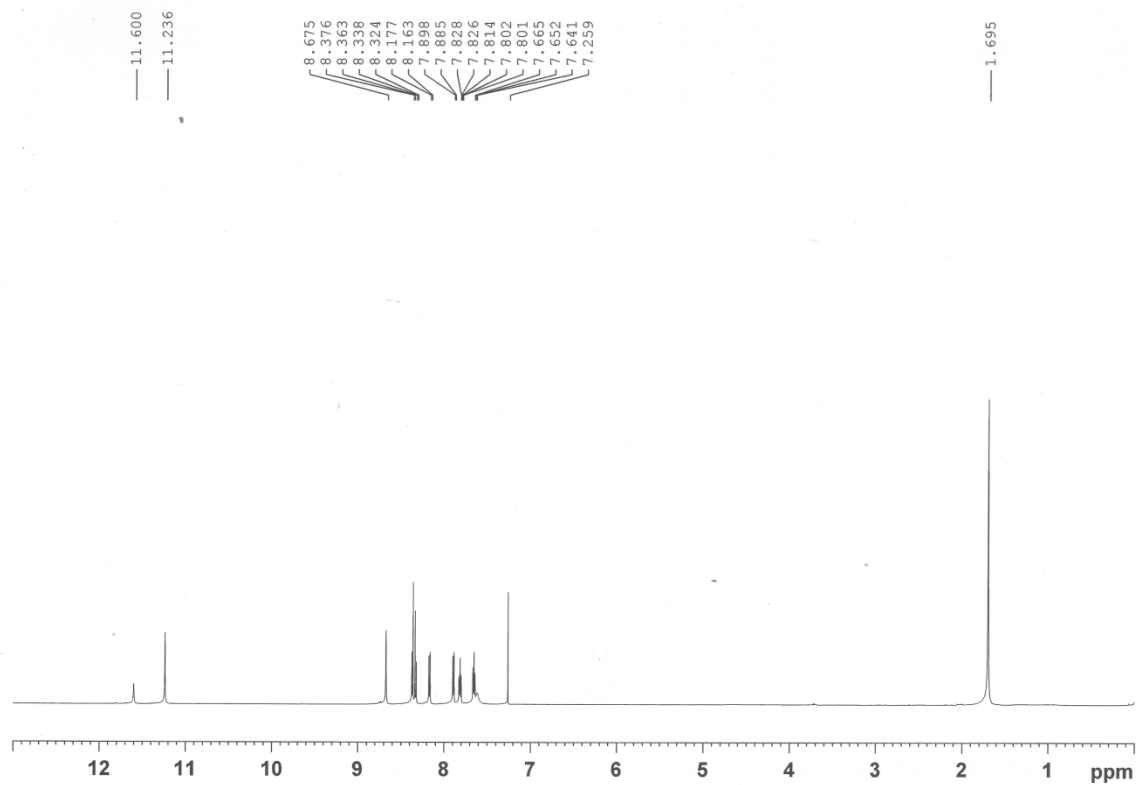

**Fig S13:** <sup>1</sup>H-NMR spectra of **L** in CDCl<sub>3</sub>.

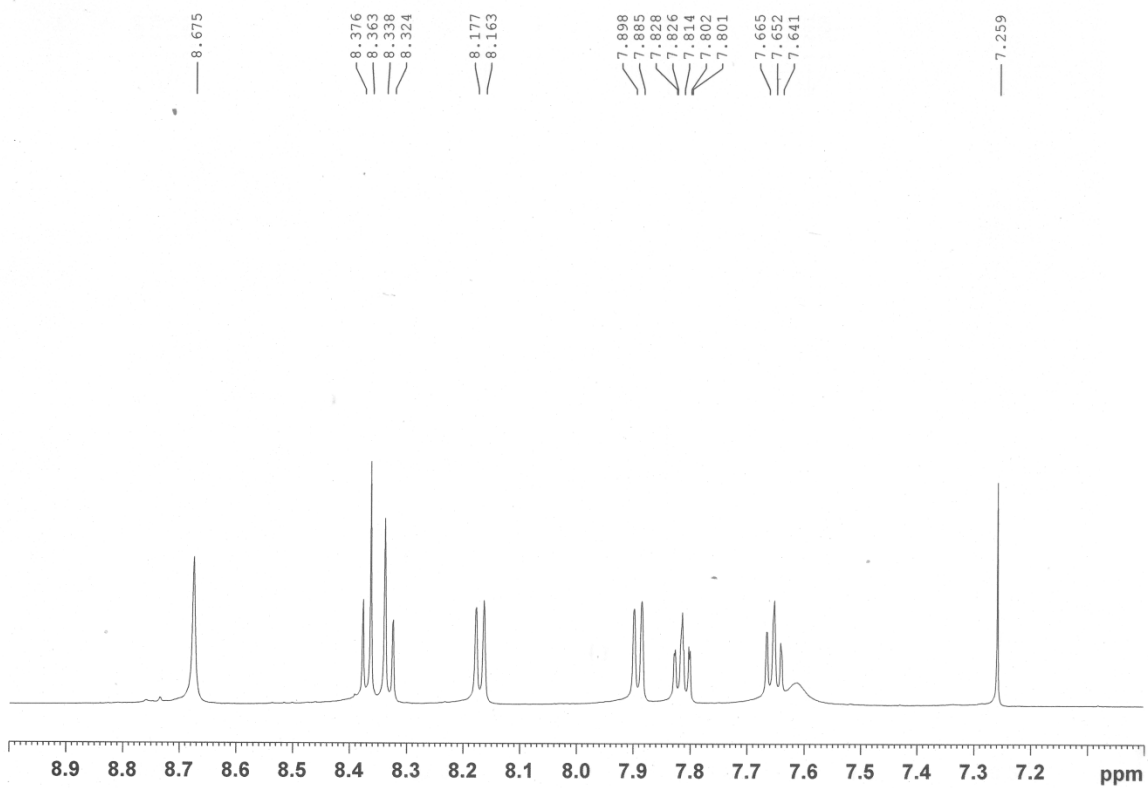

**Fig S14:** Expanded  $^1\text{H-NMR}$  spectra of **L** in  $\text{CDCl}_3$ .

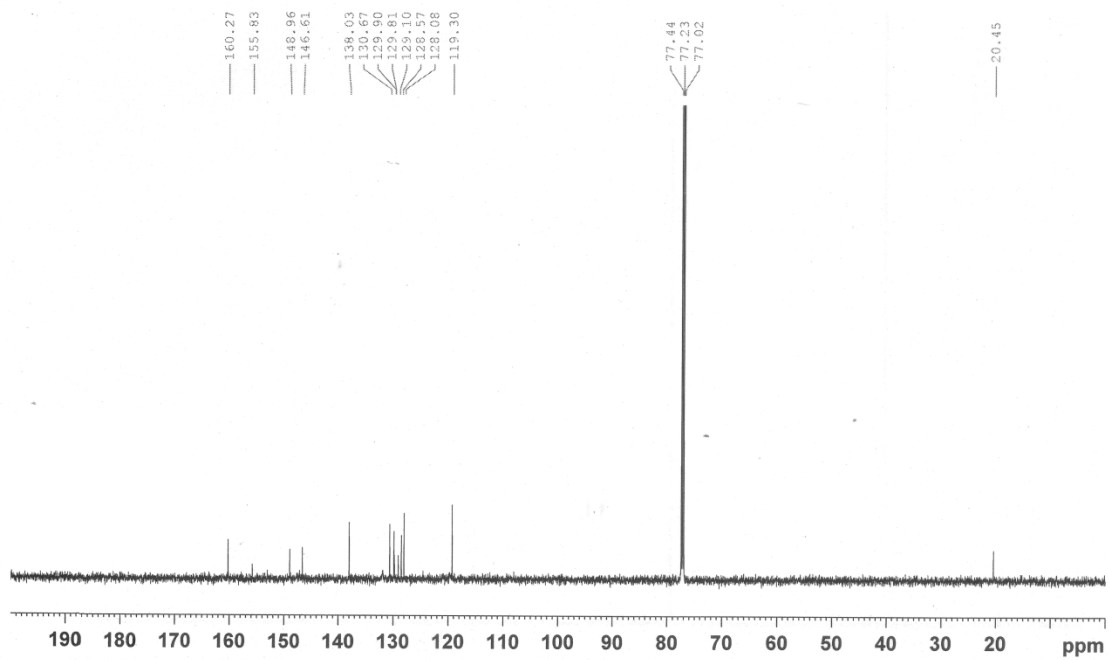

**Fig S15:**  $^{13}\text{C}$ -NMR spectra of **L** in  $\text{CDCl}_3$ .



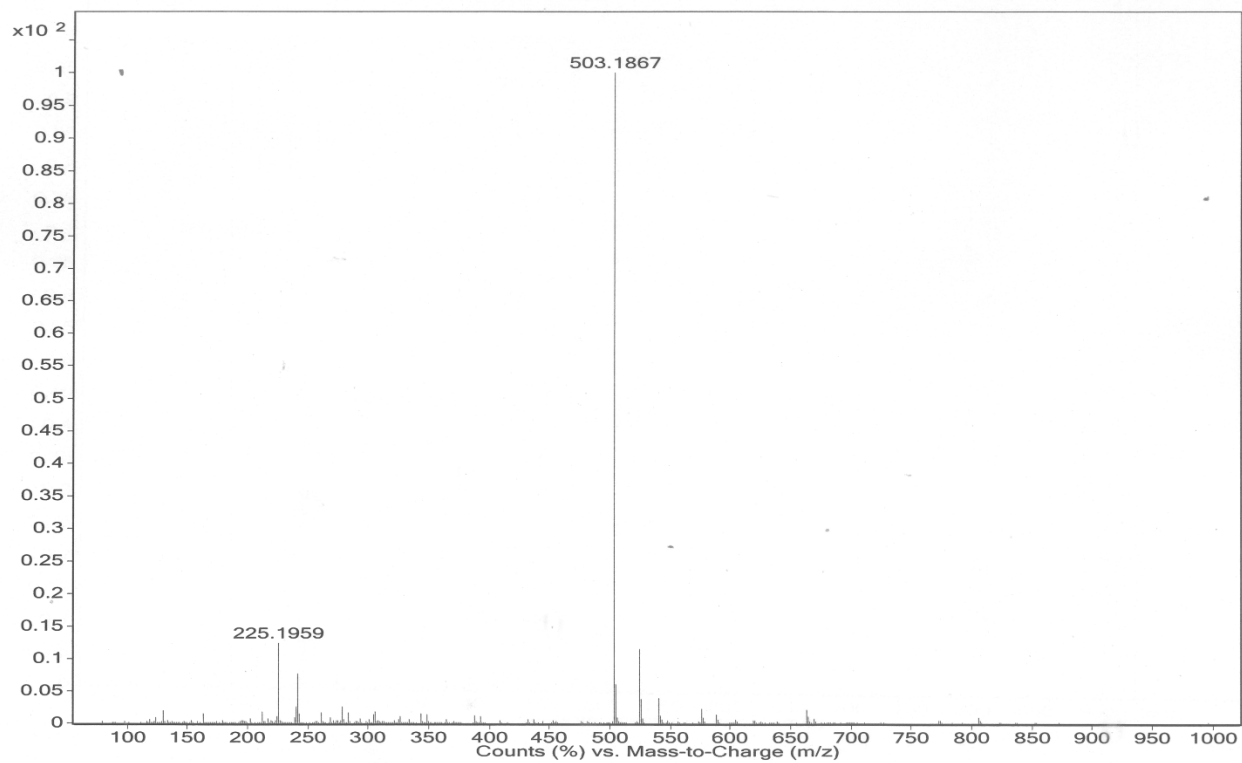

**Fig S16:** Mass spectrum of **L**, Calculated  $[\mathbf{L} + \mathbf{H}]^+ = 503.1832$ , Found 503.1867 (Mass spectrum obtained in positive mode).

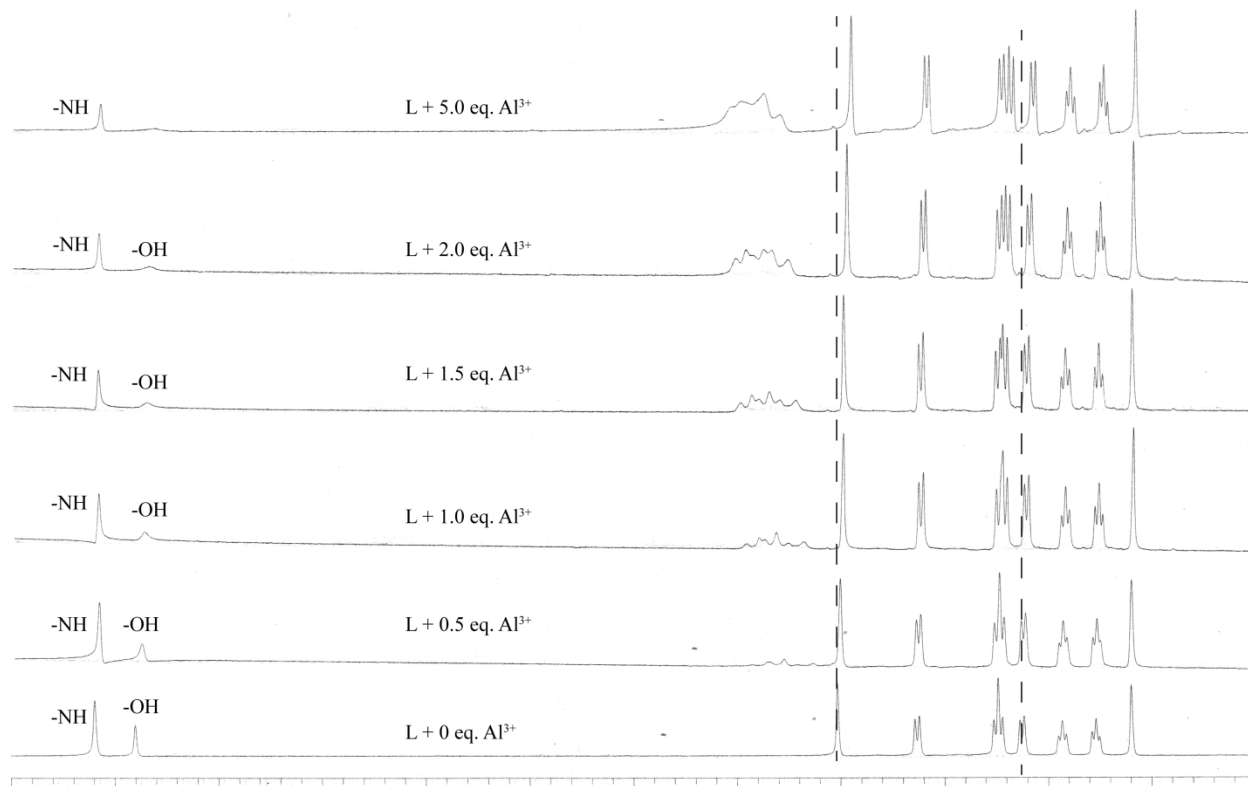

**Fig. S17:** <sup>1</sup>H-NMR titration spectras of L with Al<sup>3+</sup> in DMSO-d<sub>6</sub>.

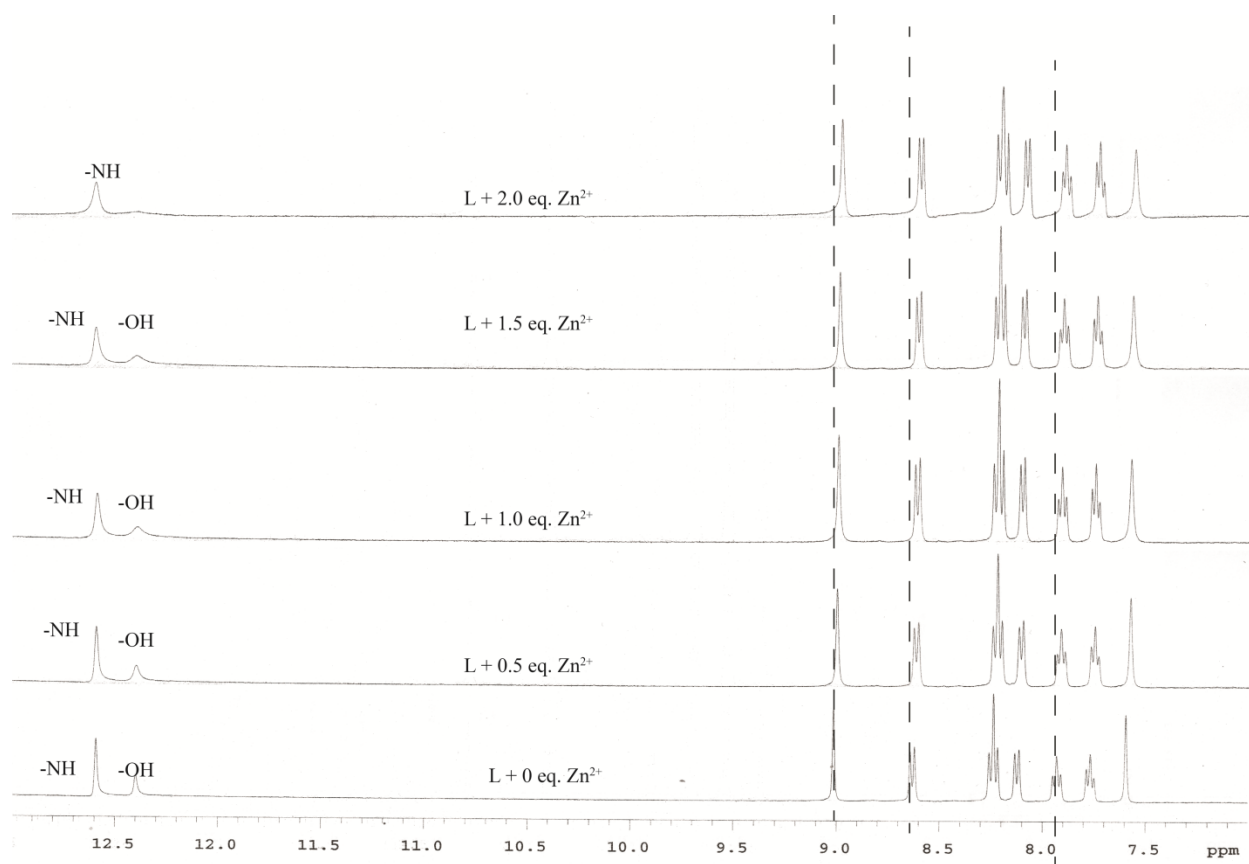

**Fig. S18:** <sup>1</sup>H-NMR titration spectras of **L** with Zn<sup>2+</sup> in DMSO-d<sub>6</sub>.

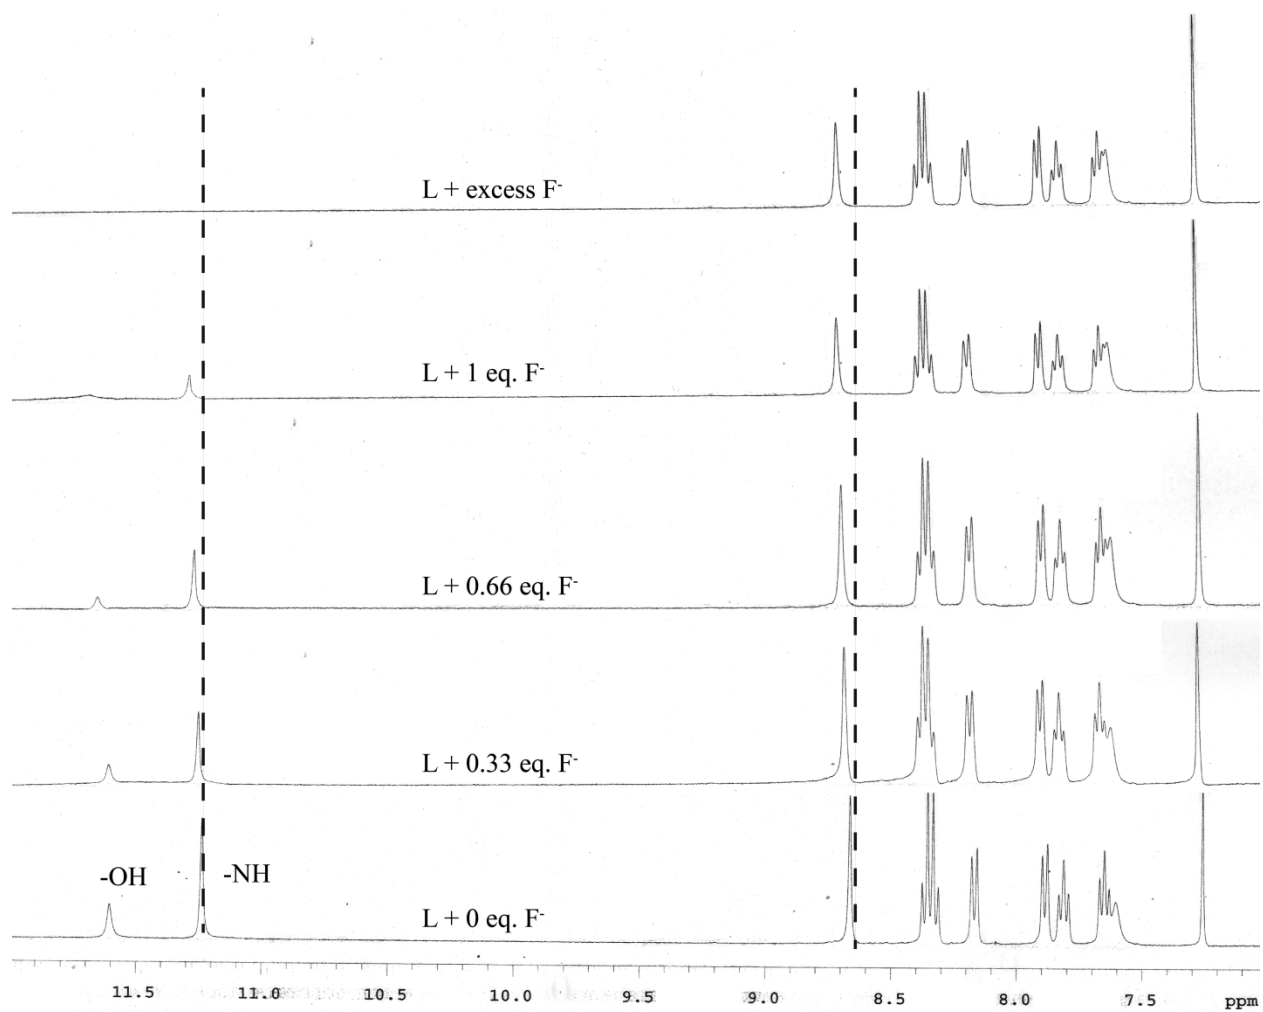

**Fig. S19:**  $^1\text{H-NMR}$  titration spectras of **L** with  $\text{F}^-$  in  $\text{CDCl}_3$ .

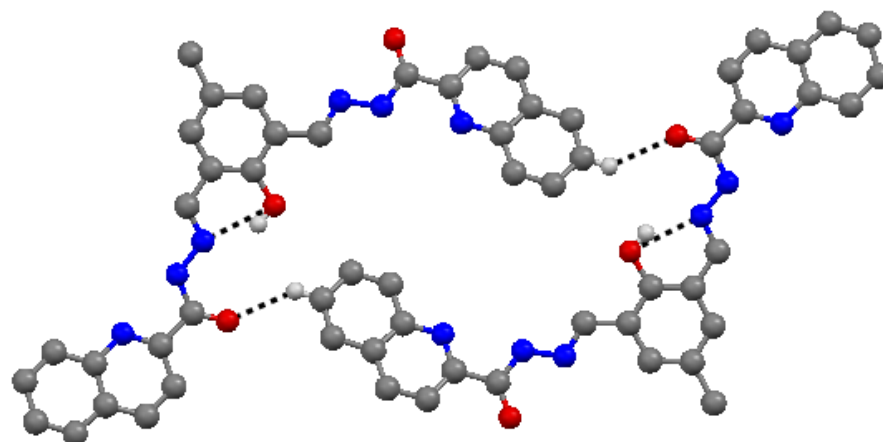

**Fig. S20:** Crystal structure of L and various interactions presents in it.
